# Supplementary material
Source: MDPI journal article supplement (https://www.mdpi.com/2304-6740/7/12/145)
Supplement: s1 [file s1]

# Supplementary Materials: $M[B_2(SO_4)_4]$ ( $M = Mn, Zn$ )—Syntheses and Crystal Structures of Two New Phyllosilicate Analogue Borosulfates

Leonard C. Pasqualini, Hubert Huppertz and Jörn Bruns

**Table S1.** Fractional atomic coordinates ( $\times 10^4$ ) and equivalent isotropic displacement parameters ( $\text{\AA}^2 \times 10^3$ ) for  $Mn[B_2(SO_4)_4]$ .  $U_{eq}$  is defined as  $1/3^{\text{rd}}$  of the trace of the orthogonalised  $U_{ij}$  tensor.

| Atom | <i>x</i>  | <i>y</i>  | <i>z</i>  | $U_{eq}$ |
|------|-----------|-----------|-----------|----------|
| Mn1  | 5000      | 0         | 5000      | 6.08(3)  |
| B1   | 6399(1)   | 4753(1)   | 3606.1(9) | 6.4(1)   |
| S1   | 7903.4(2) | 1706.6(2) | 3503.9(2) | 6.31(3)  |
| S2   | 3102.7(2) | 4120.2(2) | 3554.5(2) | 4.65(3)  |
| O111 | 6540.4(8) | 3128.5(8) | 2956.2(7) | 9.86(9)  |
| O121 | 4465.3(8) | 5113.0(7) | 3104.4(7) | 7.52(9)  |
| O122 | 2719.2(8) | 5291.9(7) | 4694.5(7) | 7.72(9)  |
| O11  | 7153(1)   | 441.6(9)  | 4209.0(9) | 14.5(1)  |
| O12  | 9630.6(9) | 2285(1)   | 4380.1(9) | 17.2(1)  |
| O21  | 3832.1(8) | 2549.2(7) | 4268.4(7) | 8.28(9)  |
| O22  | 1510.0(8) | 4014.7(8) | 2226.4(7) | 10.4(1)  |
| O112 | 7756.8(9) | 1108.1(8) | 1908.3(7) | 10.7(1)  |

**Table S2.** Anisotropic displacement parameters ( $\text{\AA}^2 \times 10^3$ ) for  $Mn[B_2(SO_4)_4]$ . The anisotropic displacement factor exponent takes the form:  $-2\pi^2[h^2a^{*2}U_{11}+2hka^*b^*U_{12}+\dots]$ .

| Atom | $U_{11}$ | $U_{22}$ | $U_{33}$ | $U_{23}$ | $U_{13}$ | $U_{12}$ |
|------|----------|----------|----------|----------|----------|----------|
| Mn1  | 6.89(6)  | 6.07(6)  | 5.01(6)  | 0.01(4)  | 1.79(5)  | −0.07(4) |
| B1   | 8.1(3)   | 5.8(3)   | 6.4(3)   | 0.0(2)   | 4.3(2)   | −0.2(2)  |
| S1   | 6.26(7)  | 7.59(7)  | 6.04(7)  | −1.04(5) | 3.38(5)  | 0.38(5)  |
| S2   | 5.65(6)  | 4.37(6)  | 3.80(6)  | 0.46(5)  | 1.53(5)  | 0.27(5)  |
| O111 | 10.8(2)  | 8.1(2)   | 10.2(2)  | −3.0(2)  | 3.2 (2)  | 3.1(2)   |
| O121 | 7.7(2)   | 7.0(2)   | 9.6(2)   | 2.6(2)   | 5.1(2)   | 0.5(2)   |
| O122 | 10.7(2)  | 7.6(2)   | 5.9(2)   | 0.2(2)   | 4.3(2)   | 2.9(2)   |
| O11  | 17.2(3)  | 13.9(3)  | 18.0(3)  | 5.9(2)   | 13.1(2)  | 2.1(2)   |
| O12  | 8.3(2)   | 21.1(3)  | 18.3(3)  | −5.1(2)  | 0.0(2)   | −2.4(2)  |
| O21  | 11.0(2)  | 4.4(2)   | 9.6(2)   | 2.2(2)   | 3.8(2)   | 1.8(2)   |
| O22  | 9.3(2)   | 12.4(2)  | 6.3(2)   | 1.5(2)   | −1.2(2)  | −1.7(2)  |
| O112 | 14.4(2)  | 11.9(2)  | 7.2(2)   | −1.0(2)  | 5.5(2)   | 6.1(2)   |

**Table S3.** Bond lengths for Mn[B<sub>2</sub>(SO<sub>4</sub>)<sub>4</sub>].

| Atom | Atom              | Length/Å  | Atom | Atom | Length/Å  |
|------|-------------------|-----------|------|------|-----------|
| Mn1  | O11 <sup>1</sup>  | 2.1388(7) | S1   | O11  | 1.4427(7) |
| Mn1  | O22 <sup>2</sup>  | 2.1400(6) | S1   | O112 | 1.5229(6) |
| Mn1  | O21 <sup>1</sup>  | 2.2276(6) | S1   | O111 | 1.5263(6) |
| B1   | O112 <sup>3</sup> | 1.440(1)  | S2   | O22  | 1.4298(6) |
| B1   | O111              | 1.443(1)  | S2   | O21  | 1.4333(6) |
| B1   | O121              | 1.483(1)  | S2   | O122 | 1.5218(6) |
| B1   | O122 <sup>4</sup> | 1.485(1)  | S2   | O121 | 1.5240(6) |
| S1   | O12               | 1.4125(7) |      |      |           |

<sup>1</sup>1-*x*, -*y*, 1-*z*; <sup>2</sup>1/2+*x*, 1/2-*y*, 1/2+*z*; <sup>3</sup>3/2-*x*, 1/2+*y*, 1/2-*z*; <sup>4</sup>1-*x*, 1-*y*, 1-*z*
**Table S4.** Bond angles for Mn[B<sub>2</sub>(SO<sub>4</sub>)<sub>4</sub>].

| Atom              | Atom | Atom              | Angle/°   | Atom            | Atom | Atom | Angle/°   |
|-------------------|------|-------------------|-----------|-----------------|------|------|-----------|
| O11 <sup>1</sup>  | Mn1  | O11               | 180       | O12             | S1   | O11  | 116.59(5) |
| O11 <sup>1</sup>  | Mn1  | O22 <sup>2</sup>  | 88.59(3)  | O12             | S1   | O112 | 112.42(4) |
| O11               | Mn1  | O22 <sup>2</sup>  | 91.41(3)  | O11             | S1   | O112 | 109.18(4) |
| O22 <sup>2</sup>  | Mn1  | O22 <sup>3</sup>  | 180       | O12             | S1   | O111 | 113.24(4) |
| O11 <sup>1</sup>  | Mn1  | O21 <sup>1</sup>  | 92.95(2)  | O11             | S1   | O111 | 107.26(4) |
| O11               | Mn1  | O21 <sup>1</sup>  | 87.05(2)  | O112            | S1   | O111 | 96.18(3)  |
| O22 <sup>2</sup>  | Mn1  | O21 <sup>1</sup>  | 90.16(2)  | O22             | S2   | O21  | 116.23(4) |
| O22 <sup>3</sup>  | Mn1  | O21 <sup>1</sup>  | 89.84(2)  | O22             | S2   | O122 | 107.23(4) |
| O21 <sup>1</sup>  | Mn1  | O21               | 180       | O21             | S2   | O122 | 110.92(3) |
| O112 <sup>4</sup> | B1   | O111              | 114.05(7) | O22             | S2   | O121 | 107.61(4) |
| O112 <sup>4</sup> | B1   | O121              | 108.55(6) | O21             | S2   | O121 | 111.08(3) |
| O111              | B1   | O121              | 105.67(6) | O122            | S2   | O121 | 102.84(3) |
| O112 <sup>4</sup> | B1   | O122 <sup>4</sup> | 105.64(6) | B1              | O111 | S1   | 132.23(6) |
| O111              | B1   | O122 <sup>4</sup> | 110.25(6) | B1              | O121 | S2   | 126.20(5) |
| O121              | B1   | O122 <sup>4</sup> | 112.82(6) | B1 <sup>4</sup> | O122 | S2   | 126.13(5) |
| S1                | O11  | Mn1               | 142.37(5) | B1 <sup>6</sup> | O112 | S1   | 132.43(6) |
| S2                | O21  | Mn1               | 170.41(4) |                 |      |      |           |
| S2                | O22  | Mn1 <sup>5</sup>  | 147.04(4) |                 |      |      |           |

<sup>1</sup>1-*x*, -*y*, 1-*z*; <sup>2</sup>1/2+*x*, 1/2-*y*, 1/2+*z*; <sup>3</sup>1/2-*x*, -1/2+*y*, 1/2-*z*; <sup>4</sup>1-*x*, 1-*y*, 1-*z*; <sup>5</sup>1/2-*x*, 1/2+*y*, 1/2-*z*; <sup>6</sup>3/2-*x*, -1/2+*y*, 1/2-*z*

**Table S5.** Fractional atomic coordinates ( $\times 10^4$ ) and equivalent isotropic displacement parameters ( $\text{\AA}^2 \times 10^3$ ) for  $\text{Zn}[\text{B}_2(\text{SO}_4)_4]$ .  $U_{\text{eq}}$  is defined as  $1/3^{\text{rd}}$  of the trace of the orthogonalised  $U_{ij}$  tensor.

| Atom | <i>x</i>  | <i>y</i>  | <i>z</i>  | $U_{\text{eq}}$ |
|------|-----------|-----------|-----------|-----------------|
| Zn1  | 5000      | 0         | 5000      | 4.97(3)         |
| B1   | 6521(1)   | 4479(1)   | 3710.7(9) | 4.8(1)          |
| S1   | 7783.9(2) | 1490.2(2) | 3325.1(2) | 4.50(3)         |
| S2   | 6649.1(2) | 3761.6(2) | 6662.0(2) | 3.29(3)         |
| O11  | 7007.8(1) | 332.7(8)  | 4122.7(9) | 11.8(1)         |
| O12  | 9631.9(9) | 1937.1(9) | 4144.8(8) | 11.9(1)         |
| O21  | 5567.6(8) | 2293.6(7) | 6177.8(7) | 7.74(9)         |
| O22  | 8148.8(8) | 3661.3(7) | 8142.8(7) | 7.08(9)         |
| O111 | 6508.1(8) | 2976.4(7) | 2817.7(7) | 6.90(9)         |
| O112 | 7478.5(8) | 818.7(7)  | 1664.6(7) | 6.84(9)         |
| O211 | 7466.4(8) | 4271.0(8) | 5440.3(7) | 6.60(9)         |
| O212 | 5467.9(8) | 5213.5(7) | 6732.5(7) | 6.03(8)         |

**Table S6.** Anisotropic displacement parameters ( $\text{\AA}^2 \times 10^3$ ) for  $\text{Zn}[\text{B}_2(\text{SO}_4)_4]$ . The anisotropic displacement factor exponent takes the form:  $-2\pi^2[h^2a^{*2}U_{11}+2hka^*b^*U_{12}+\dots]$ .

| Atom | $U_{11}$ | $U_{22}$ | $U_{33}$ | $U_{23}$ | $U_{13}$ | $U_{12}$ |
|------|----------|----------|----------|----------|----------|----------|
| Zn1  | 5.95(5)  | 4.37(5)  | 4.86(5)  | 0.13(3)  | 2.26(4)  | −0.32(3) |
| B1   | 6.1(3)   | 4.0(3)   | 5.6(3)   | 0.6(2)   | 3.5(2)   | 0.5(2)   |
| S1   | 5.25(7)  | 4.26(6)  | 4.99(6)  | −0.25(5) | 3.04(5)  | 0.86(5)  |
| S2   | 4.11(6)  | 2.97(6)  | 2.82(6)  | −0.26(4) | 1.30(5)  | 0.25(4)  |
| O11  | 15.7(3)  | 9.2(2)   | 16.3(3)  | 5.6(2)   | 13.0(2)  | 3.4(2)   |
| O12  | 6.2(2)   | 15.1(3)  | 12.2(2)  | −3.8(2)  | 0.8(2)   | −0.3(2)  |
| O21  | 9.7(2)   | 4.7(2)   | 8.9(2)   | −3.0(2)  | 3.5(2)   | −2.9(2)  |
| O22  | 7.0(2)   | 8.2(2)   | 3.9(2)   | −0.5(2)  | −0.6(2)  | 1.1(2)   |
| O111 | 8.8(2)   | 4.3(2)   | 7.5(2)   | −1.2(2)  | 2.8(2)   | 2.8(2)   |
| O112 | 8.6(2)   | 6.6(2)   | 5.9(2)   | −1.7(2)  | 3.4(2)   | 2.7(2)   |
| O211 | 6.1(2)   | 10.1(2)  | 4.8(2)   | 1.2(2)   | 3.4(2)   | 0.13(2)  |
| O212 | 5.3(2)   | 4.2(2)   | 9.1(2)   | −0.8(2)  | 3.3(2)   | 1.3(2)   |

**Table S7.** Bond lengths for Zn[B<sub>2</sub>(SO<sub>4</sub>)<sub>4</sub>].

| Atom | Atom              | Length/Å  | Atom | Atom | Length/Å  |
|------|-------------------|-----------|------|------|-----------|
| Zn1  | O11               | 2.0199(6) | S1   | O12  | 1.4135(7) |
| Zn1  | O22 <sup>2</sup>  | 2.0811(6) | S1   | O11  | 1.4442(7) |
| Zn1  | O21               | 2.1063(6) | S1   | O111 | 1.5247(6) |
| Zn1  | O21 <sup>1</sup>  | 2.1063(6) | S1   | O112 | 1.5315(6) |
| B1   | O112 <sup>3</sup> | 1.449(1)  | S2   | O22  | 1.4277(6) |
| B1   | O111              | 1.458(1)  | S2   | O21  | 1.4329(6) |
| B1   | O211              | 1.477(1)  | S2   | O212 | 1.5116(6) |
| B1   | O212 <sup>4</sup> | 1.482(1)  | S2   | O211 | 1.5208(6) |

<sup>1</sup>1-x,-y,1-z; <sup>2</sup>3/2-x,-1/2+y,3/2-z; <sup>3</sup>3/2-x,1/2+y,1/2-z; <sup>4</sup>1-x,1-y,1-z
**Table S8.** Bond angles for Zn[B<sub>2</sub>(SO<sub>4</sub>)<sub>4</sub>].

| Atom              | Atom | Atom              | Angle/°   | Atom | Atom | Atom              | Angle/°   |
|-------------------|------|-------------------|-----------|------|------|-------------------|-----------|
| O11               | Zn1  | O11 <sup>1</sup>  | 180       | O211 | B1   | O212 <sup>5</sup> | 112.32(6) |
| O11               | Zn1  | O22 <sup>2</sup>  | 91.60(3)  | O12  | S1   | O11               | 116.16(4) |
| O11 <sup>1</sup>  | Zn1  | O22 <sup>2</sup>  | 88.40(3)  | O12  | S1   | O111              | 113.00(4) |
| O22 <sup>2</sup>  | Zn1  | O22 <sup>3</sup>  | 180       | O11  | S1   | O111              | 108.28(4) |
| O11               | Zn1  | O21               | 91.67(3)  | O12  | S1   | O112              | 111.78(4) |
| O22 <sup>2</sup>  | Zn1  | O21               | 84.62(2)  | O11  | S1   | O112              | 108.34(4) |
| O22 <sup>3</sup>  | Zn1  | O21               | 95.38(2)  | O111 | S1   | O112              | 97.64(3)  |
| O11               | Zn1  | O21 <sup>1</sup>  | 88.33(3)  | O22  | S2   | O21               | 115.70(4) |
| O21               | Zn1  | O21 <sup>1</sup>  | 180       | O22  | S2   | O212              | 108.23(3) |
| O112 <sup>4</sup> | B1   | O111              | 113.00(6) | O21  | S2   | O212              | 110.78(4) |
| O112 <sup>4</sup> | B1   | O211              | 103.12(6) | O22  | S2   | O211              | 106.04(4) |
| O111              | B1   | O211              | 113.02(6) | O21  | S2   | O211              | 111.17(3) |
| O112 <sup>4</sup> | B1   | O212 <sup>5</sup> | 114.58(6) | O212 | S2   | O211              | 104.18(3) |
| O111              | B1   | O212 <sup>5</sup> | 101.24(6) | S1   | O11  | Zn1               | 144.22(4) |
| B1                | O111 | S1                | 128.31(5) | S2   | O21  | Zn1               | 151.50(4) |
| B1 <sup>6</sup>   | O112 | S1                | 126.14(5) | S2   | O22  | Zn1 <sup>7</sup>  | 145.35(4) |
| B1                | O211 | S2                | 128.18(5) |      |      |                   |           |
| B1 <sup>5</sup>   | O212 | S2                | 135.95(5) |      |      |                   |           |

<sup>1</sup>1-x,-y,1-z; <sup>2</sup>-1/2+x,1/2-y,-1/2+z; <sup>3</sup>3/2-x,-1/2+y,3/2-z; <sup>4</sup>3/2-x,1/2+y,1/2-z; <sup>5</sup>1-x,1-y,1-z; <sup>6</sup>3/2-x,-1/2+y,1/2-z; <sup>7</sup>3/2-x,1/2+y,3/2-z

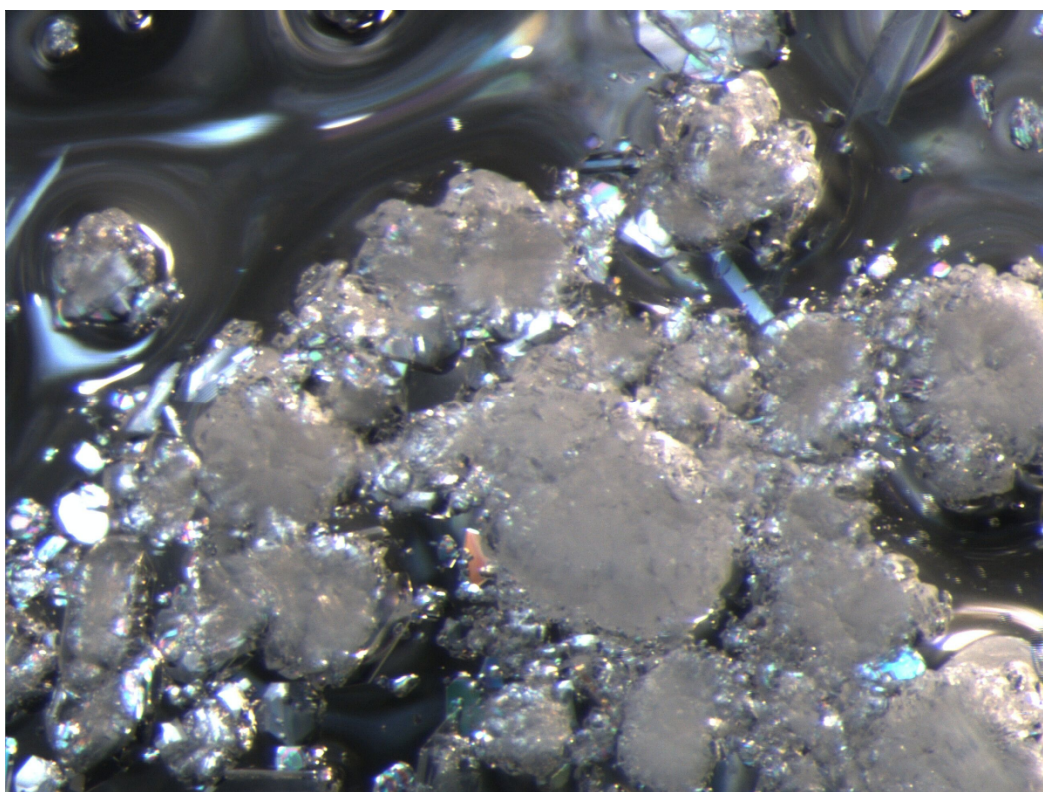

**Figure S1.** Crystals of Zn[B<sub>2</sub>(SO<sub>4</sub>)<sub>4</sub>] under a polarization microscope.

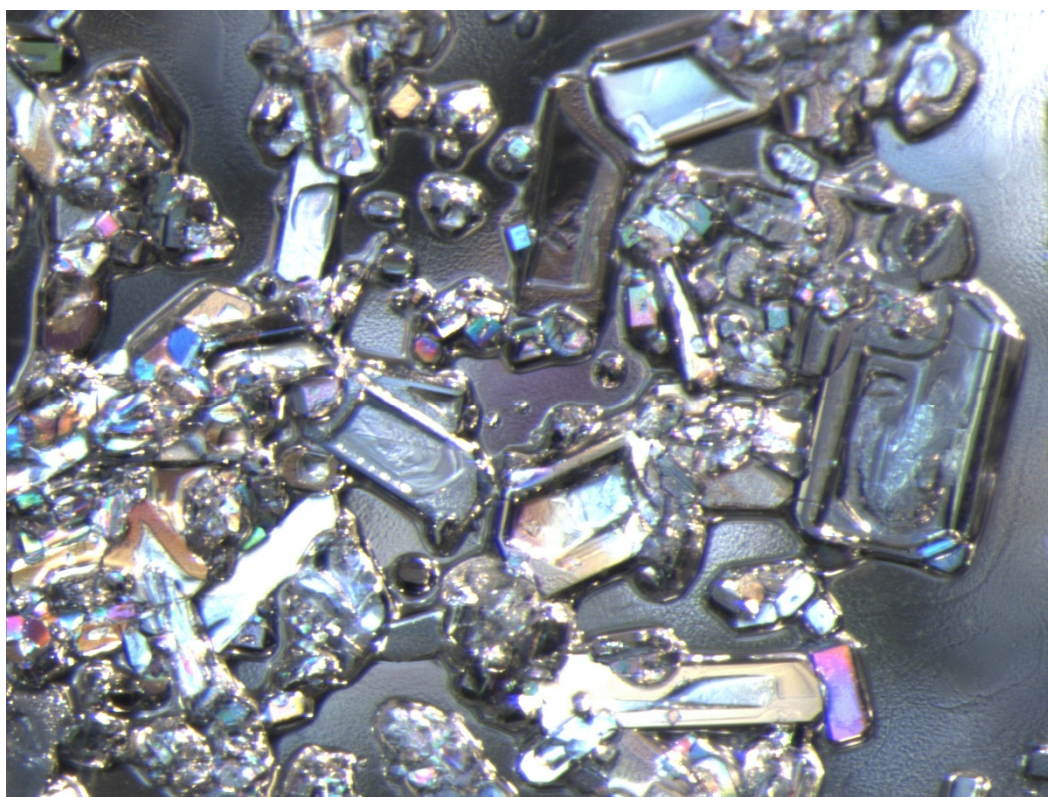

**Figure S2.** Crystals of Mn[B<sub>2</sub>(SO<sub>4</sub>)<sub>4</sub>] under a polarization microscope.
